# Supplementary material for: Investigation on the Effect of Oral Breathing on Cognitive Activity Using Functional Brain Imaging
Source: MDPI journal article supplement (doi:10.3390/healthcare9060645), 2021-05-29
Supplement: s1 [file s1]

# Supplementary Information for “Investigation for the effect of oral breathing on cognitive activity using functional brain imaging”

Ju-Yeon Jung <sup>1</sup> and Chang-Ki Kang <sup>1,2,3,\*</sup>

- 1 Department of Health Science, Gachon University Graduate School, Incheon 21936, Korea; 95me@naver.com
  - 2 Neuroscience Research Institute, Gachon University, Incheon 21565, Korea
  - 3 Department of Radiological Science, College of Health Science, Gachon University, Incheon 21936, Korea
- \* Correspondence: ckkang@gachon.ac.kr (C.-K.K.); Tel.: +82-32-820-4110

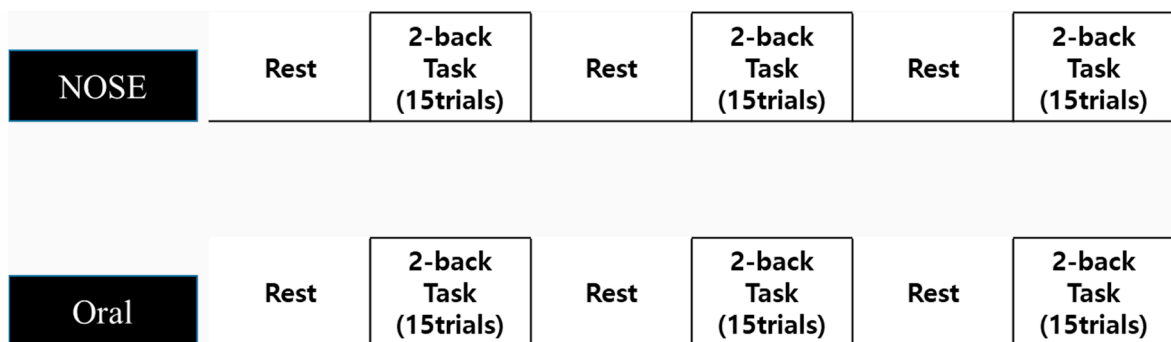

Figure S1. A study design.

Table S1. General information about motion values of oral and nose breathings.

|       |      | X       | Y       | Z       | Pitch   | Roll    | Yaw     |
|-------|------|---------|---------|---------|---------|---------|---------|
| Mouth | Mean | 0.0187  | 0.0907  | 0.0353  | 0.0013  | 0.0002  | 0.0004  |
|       | SD   | 0.1959  | 0.2656  | 0.3073  | 0.0090  | 0.0039  | 0.0049  |
|       | Max  | 0.8160  | 1.2416  | 1.5249  | 0.0331  | 0.0106  | 0.0246  |
|       | Min  | -0.9675 | -1.6865 | -1.6601 | -0.0433 | -0.0119 | -0.0180 |
| Nose  | Mean | 0.0255  | 0.0886  | -0.0417 | 0.0003  | -0.0009 | 0.0004  |
|       | SD   | 0.1724  | 0.1640  | 0.4055  | 0.0068  | 0.0039  | 0.0041  |
|       | Max  | 0.6214  | 1.7725  | 1.6641  | 0.0302  | 0.0099  | 0.0150  |
|       | Min  | -0.4812 | -0.4016 | -2.0736 | -0.0267 | -0.0119 | -0.0140 |

Table S2. Statistical result for mean of motion translation of mouth and nose breathings.

| Motions     | Axis  | Statistics (T) | P value |
|-------------|-------|----------------|---------|
| Translation | X     | -0.1379        | 0.8917  |
|             | Y     | 0.0500         | 0.9666  |
|             | Z     | 0.9489         | 0.3535  |
| Rotation    | Pitch | 0.5328         | 0.5997  |
|             | Roll  | 1.2015         | 0.2429  |
|             | Yaw   | 0.02757        | 0.9783  |

Table S3. General characteristics.

| Parameters              | Value (n = 22) |
|-------------------------|----------------|
| Gender (n) <sup>†</sup> |                |
| Male                    | 10             |
| Female                  | 12             |
| Age (year)*             | 22.27 ± 1.42   |
| Height (cm)*            | 170.14 ± 9.28  |
| Weight (kg)*            | 64.85 ± 9.34   |

<sup>†</sup> Values are expressed as Number (n).

\* Values are expressed as Mean ± SD
